# Supplementary material for: Modulation of mouse laryngeal inflammatory and immune cell responses by low and high doses of mainstream cigarette smoke
Source: Research Square preprint supplement (doi:10.21203/rs.3.rs-1762755/v1), 2022-07-22
Supplement: Supplementary file 1 [file 6cee727e7d0a75c4f405bc1d.xlsx]

## Sheet: Supplementary Table S1
Supplementary Table S1. Differential gene expression analysis between LD and Contol groups
Genes	log2 fold change	p-value	False discovery rate (FDR)		Criteria for significance
Il1rap	0.601	0.00158	0.209
Ccl2	-2.77	0.0028	0.209		p-value ≤ 0.05 and
Map3k1	0.747	0.00363	0.209		FDR < 0.2 and
Mmp3	-2.04	0.00679	0.294		fold change > +1.25 or fold change < -1.25
Ccl22	-2.02	0.017	0.478		(log2 fold change > +0.32 or log2 fold change < -0.32)
Tlr8	-0.885	0.0172	0.478
Gnaq	0.384	0.0204	0.478
Alox5	-0.939	0.0254	0.478
Areg	-1.77	0.0262	0.478
Nr3c1	0.368	0.0286	0.478
Cxcr2	-2.15	0.0304	0.478
Retnla	-0.769	0.037	0.521
Mknk1	0.358	0.041	0.521
Ptgs2	-1.11	0.0497	0.521
Ccl19	-1.14	0.0516	0.521
Mx1	0.949	0.0521	0.521
Nod1	0.354	0.0537	0.521
Tnfaip3	-0.776	0.056	0.521
Grb2	0.249	0.0642	0.521
Il1b	-0.918	0.0658	0.521
Hmgb1	0.215	0.0679	0.521
Tlr4	0.254	0.0731	0.521
Ccl20	-1.55	0.0738	0.521
Ptgs1	-0.591	0.0747	0.521
Cfl1	-0.309	0.0752	0.521
Il6ra	-0.376	0.0798	0.522
Fxyd2	0.577	0.0827	0.522
Rela	0.237	0.0865	0.522
Hsh2d	1.11	0.0877	0.522
Masp1	-0.477	0.0919	0.522
Hspb1	-0.816	0.0954	0.522
Cebpb	-0.251	0.0965	0.522
Atf2	0.363	0.101	0.527
Il1a	-1.37	0.104	0.527
Cysltr1	0.546	0.107	0.527
Ccl11	-0.58	0.119	0.559
Ccl21a	-0.481	0.12	0.559
Cd163	-0.634	0.129	0.589
Tcf4	0.378	0.139	0.618
Itgb2	-0.479	0.152	0.657
Map3k5	0.461	0.169	0.685
Ddit3	0.201	0.17	0.685
Il1rn	-0.896	0.177	0.685
Stat1	-0.41	0.178	0.685
Ltb4r1	-0.712	0.179	0.685
C2	0.561	0.189	0.685
Birc2	0.217	0.189	0.685
Chi3l3	1.58	0.19	0.685
Cd55	0.481	0.196	0.685
Cd86	-0.655	0.2	0.685
Oasl1	-0.711	0.202	0.685
Tlr1	-0.862	0.208	0.69
Myd88	-0.239	0.211	0.69
Tollip	0.163	0.217	0.694
Smad7	0.235	0.224	0.697
Fos	-0.429	0.228	0.697
Tlr9	-0.663	0.23	0.697
Tnf	-1.16	0.234	0.698
Arg1	-0.793	0.241	0.706
Pla2g4a	0.344	0.248	0.715
Jun	-0.294	0.263	0.721
Ccl8	-0.679	0.267	0.721
Ptger2	-0.769	0.268	0.721
Cxcl1	-0.782	0.272	0.721
Nod2	-0.636	0.272	0.721
Relb	-0.226	0.283	0.721
Irf5	-0.433	0.289	0.721
Ltb	-0.704	0.295	0.721
Max	-0.28	0.296	0.721
Mef2d	0.183	0.299	0.721
Ripk1	0.224	0.305	0.721
Raf1	0.0952	0.307	0.721
Rapgef2	0.177	0.307	0.721
Nfkb1	0.16	0.308	0.721
Gnas	0.17	0.317	0.722
Maff	-0.271	0.32	0.722
Ifit2	0.333	0.329	0.722
Ly96	0.152	0.332	0.722
Mafg	0.225	0.335	0.722
H2-Eb1	-0.481	0.34	0.722
Nfatc3	0.101	0.342	0.722
Cdc42	-0.0989	0.342	0.722
Mapk14	-0.214	0.356	0.726
C1qb	-0.307	0.363	0.726
Il10rb	0.154	0.363	0.726
Ptgfr	0.28	0.37	0.726
Map2k4	-0.192	0.375	0.726
Ltb4r2	-0.862	0.379	0.726
Il18	-0.661	0.386	0.726
Bcl6	0.134	0.39	0.726
Alox15	-0.368	0.394	0.726
Pdgfa	0.186	0.4	0.726
Ptger3	-0.401	0.401	0.726
C3ar1	-0.31	0.403	0.726
Myc	-0.308	0.403	0.726
Limk1	-0.237	0.409	0.726
Oas1a	-0.61	0.41	0.726
Alox12	0.159	0.414	0.726
Mapk3	0.154	0.415	0.726
Iigp1	-0.554	0.423	0.732
Map2k1	-0.157	0.43	0.737
Nos2	0.347	0.441	0.748
Shc1	0.12	0.46	0.773
Plcb1	-0.239	0.494	0.809
Prkca	0.141	0.496	0.809
Rock2	-0.0932	0.496	0.809
Stat3	0.0801	0.507	0.809
Ifit1	0.268	0.51	0.809
Nfe2l2	-0.167	0.512	0.809
Rac1	-0.0755	0.515	0.809
Ccr2	-0.342	0.524	0.816
Ccl24	0.201	0.549	0.832
C3	-0.265	0.558	0.832
Ptk2	0.0994	0.56	0.832
Ifi27l2a	-0.295	0.563	0.832
Twist2	0.217	0.569	0.832
Tlr2	0.353	0.57	0.832
Tgfb2	0.191	0.571	0.832
Ifit3	0.234	0.572	0.832
Flt1	0.144	0.586	0.837
C1qa	-0.196	0.589	0.837
Ptger4	0.0818	0.592	0.837
Mapkapk2	0.0672	0.599	0.837
Csf1	0.191	0.6	0.837
Tradd	-0.129	0.605	0.838
Hspb2	-0.166	0.614	0.843
Cxcr4	-0.177	0.635	0.865
Keap1	0.0475	0.641	0.866
Mmp9	-0.244	0.666	0.893
Hdac4	-0.0558	0.69	0.91
Mapk8	0.0534	0.691	0.91
Ptgir	-0.229	0.697	0.91
Tyrobp	-0.152	0.706	0.91
C1s	-0.107	0.712	0.91
Traf2	-0.0833	0.713	0.91
Stat2	0.128	0.716	0.91
Il1r1	-0.0789	0.729	0.914
Il7	-0.21	0.73	0.914
Tlr7	-0.174	0.739	0.914
Hmgn1	-0.061	0.739	0.914
Ppp1r12b	0.0948	0.764	0.938
Tgfbr1	0.0575	0.784	0.947
C1ra	-0.0952	0.785	0.947
Daxx	0.0509	0.788	0.947
Map2k6	0.0729	0.819	0.964
C7	0.0559	0.83	0.964
Ccl5	-0.143	0.835	0.964
Prkcb	-0.0954	0.839	0.964
Bcl2l1	0.024	0.847	0.964
Mef2a	0.0995	0.848	0.964
Myl2	0.177	0.848	0.964
Irf1	0.0613	0.853	0.964
Rhoa	0.0167	0.857	0.964
Gnb1	-0.0259	0.858	0.964
Cfb	-0.115	0.869	0.965
Ager	-0.173	0.877	0.965
Ripk2	0.0459	0.889	0.965
Irf7	0.0489	0.901	0.965
Ifi44	0.0742	0.912	0.965
Rps6ka5	-0.0202	0.914	0.965
Il15	0.039	0.921	0.965
Tgfb3	0.0282	0.926	0.965
Mef2c_Mm	0.029	0.93	0.965
Tlr5	0.0283	0.93	0.965
Cfd	-0.0656	0.93	0.965
Cxcl5	-0.0819	0.932	0.965
Mrc1	-0.0341	0.932	0.965
Mapk1	0.00944	0.951	0.979
Map3k7	-0.00591	0.959	0.981
Hif1a	0.00398	0.975	0.987
C4a	-0.0137	0.976	0.987
Tgfb1	-0.00248	0.988	0.994
Mafk	1.91e-15	1	1

## Sheet: Supplementary Table S2
Supplementary Table S2. Differential gene expression analysis between HD and Contol groups
Genes	log2 fold change	p-value	False discovery rate (FDR)		Criteria for significance
Il1rap	0.799	0.000205	0.0355
Itgb2	-1.69	0.000552	0.0477		p-value ≤ 0.05 and
Retnla	-1.36	0.0019	0.0873		FDR < 0.2 and
Cxcl5	-4.18	0.00224	0.0873		fold change > +1.25 or fold change < -1.25
Tnfaip3	-1.49	0.00252	0.0873		(log2 fold change > +0.32 or log2 fold change < -0.32)
Tollip	0.481	0.00341	0.0982
Ccl20	-2.95	0.00426	0.101
Mmp3	-2.17	0.00482	0.101
Ccl2	-2.48	0.00527	0.101
Il1b	-1.67	0.00595	0.103
Mapk3	0.601	0.00856	0.125
Cxcr4	-1.26	0.00866	0.125
Alox15	-1.36	0.00948	0.126
Tlr5	-0.994	0.0114	0.134
Tlr8	-0.968	0.0116	0.134
Cxcl1	-2.43	0.0133	0.144
Nfe2l2	0.728	0.0154	0.156
Masp1	-0.78	0.0166	0.16
Map3k1	0.548	0.0192	0.164
Ccl19	-1.44	0.0196	0.164
Ccl22	-1.93	0.0208	0.164
Nfatc3	0.281	0.0209	0.164
H2-Eb1	-1.28	0.025	0.187
Chi3l3	-3.09	0.0263	0.187
Cd163	-1.01	0.0274	0.187
Ccl5	-1.89	0.028	0.187
Mmp9	-1.58	0.0305	0.196
Relb	-0.455	0.0492	0.304
Ccl8	-1.29	0.0519	0.308
Hif1a	0.274	0.0535	0.308
Ptgs2	-1.06	0.059	0.328
Tlr4	0.268	0.0606	0.328
Cd86	-1.02	0.0663	0.331
Ccl11	-0.703	0.0665	0.331
Gnaq	0.282	0.069	0.331
Tnf	-1.93	0.0691	0.331
Alox12	0.372	0.0709	0.331
Mapk1	0.297	0.0738	0.336
Il10rb	0.318	0.078	0.343
Myc	0.693	0.0792	0.343
Irf7	-0.724	0.0942	0.397
Fos	-0.596	0.106	0.43
Oas1a	-1.26	0.11	0.43
Hspb2	-0.564	0.112	0.43
Ccr2	-0.91	0.112	0.43
Ltb	-1.13	0.115	0.431
Stat1	-0.48	0.122	0.446
Rela	0.209	0.124	0.446
Cfb	-1.14	0.128	0.452
Ccl24	0.523	0.137	0.456
Mef2a	0.778	0.137	0.456
C1qb	-0.52	0.139	0.456
Cfl1	-0.246	0.144	0.456
Prkca	-0.322	0.147	0.456
Rock2	-0.205	0.153	0.456
Daxx	0.286	0.154	0.456
Tlr1	-1	0.155	0.456
Rhoa	0.14	0.155	0.456
Il18	1.12	0.155	0.456
Tradd	0.356	0.162	0.466
Tyrobp	-0.585	0.169	0.479
Tlr7	-0.744	0.176	0.484
Alox5	-0.515	0.176	0.484
Ltb4r2	1.23	0.181	0.485
Max	0.361	0.182	0.485
Il1a	-1.08	0.19	0.49
Ptgs1	0.4	0.19	0.49
Irf1	-0.449	0.196	0.495
C2	-0.559	0.197	0.495
Il15	0.511	0.201	0.497
Ptger2	-0.88	0.212	0.518
Mknk1	0.198	0.225	0.526
Tgfb1	-0.213	0.225	0.526
Nr3c1	0.184	0.226	0.526
Ager	1.4	0.229	0.526
Nod2	-0.7	0.231	0.526
Ifi27l2a	-0.626	0.234	0.526
Ripk2	0.401	0.237	0.526
Mx1	0.529	0.247	0.535
Hmgb1	0.128	0.247	0.535
Plcb1	-0.41	0.255	0.544
Map3k7	0.134	0.258	0.544
Areg	-0.752	0.274	0.572
Ccl21a	-0.319	0.282	0.581
Atf2	0.224	0.288	0.587
Tgfb3	-0.321	0.306	0.601
Il1r1	-0.24	0.306	0.601
Hmgn1	0.192	0.309	0.601
Tlr9	-0.547	0.309	0.601
Ifi44	-0.686	0.325	0.625
Ppp1r12b	-0.314	0.334	0.629
Hdac4	0.138	0.334	0.629
Map2k1	0.19	0.343	0.633
Ifit2	0.322	0.344	0.633
C3	-0.423	0.357	0.648
Cysltr1	0.299	0.36	0.648
Ddit3	-0.131	0.365	0.65
Tgfb2	-0.306	0.377	0.66
Oasl1	-0.479	0.377	0.66
Mafg	0.194	0.404	0.682
Maff	0.221	0.405	0.682
C1qa	-0.304	0.409	0.682
Ptgir	-0.503	0.412	0.682
C3ar1	-0.304	0.412	0.682
Ptger4	0.126	0.414	0.682
Mrc1	-0.311	0.445	0.727
Map2k4	0.159	0.458	0.737
Bcl2l1	0.0922	0.463	0.737
Mapk14	0.167	0.464	0.737
Ifit1	-0.282	0.491	0.754
Hsh2d	0.429	0.491	0.754
Nod1	0.114	0.492	0.754
Ptgfr	0.212	0.492	0.754
Tgfbr1	-0.141	0.507	0.757
Map2k6	0.213	0.508	0.757
Iigp1	-0.448	0.514	0.757
Mef2c_Mm	-0.218	0.515	0.757
Rps6ka5	0.12	0.52	0.757
C1s	-0.187	0.524	0.757
Tcf4	0.154	0.525	0.757
Cebpb	0.0874	0.532	0.757
Stat3	0.0748	0.535	0.757
Prkcb	-0.293	0.538	0.757
Ltb4r1	0.288	0.551	0.769
Flt1	-0.16	0.555	0.769
Rac1	0.0666	0.564	0.774
C4a	-0.255	0.572	0.779
Smad7	0.103	0.579	0.783
Il6ra	-0.105	0.588	0.789
Mapk8	0.0705	0.6	0.79
C7	-0.137	0.602	0.79
Nos2	-0.231	0.604	0.79
Gnb1	0.0748	0.607	0.79
Map3k5	0.162	0.612	0.79
Il7	-0.3	0.624	0.793
Cfd	-0.368	0.626	0.793
Mafk	-0.0982	0.629	0.793
Stat2	-0.169	0.635	0.793
Keap1	-0.048	0.638	0.793
Traf2	0.104	0.642	0.793
Myd88	0.0813	0.656	0.804
Limk1	-0.121	0.666	0.807
Grb2	0.0528	0.667	0.807
Ptger3	-0.194	0.679	0.816
Ripk1	-0.0863	0.689	0.822
Pdgfa	-0.0809	0.71	0.841
Tlr2	0.226	0.715	0.841
Mapkapk2	-0.0432	0.734	0.855
Irf5	-0.133	0.736	0.855
Hspb1	0.149	0.741	0.855
C1ra	0.111	0.749	0.858
Myl2	-0.286	0.756	0.861
Jun	0.0754	0.766	0.861
Shc1	-0.0481	0.766	0.861
Nfkb1	-0.0401	0.793	0.884
Raf1	-0.0233	0.797	0.884
Il1rn	-0.154	0.805	0.884
Cxcr2	0.202	0.807	0.884
Twist2	0.0875	0.818	0.891
Fxyd2	0.0685	0.825	0.892
Pla2g4a	-0.0517	0.858	0.921
Ptk2	-0.0277	0.87	0.929
Arg1	0.0886	0.891	0.946
Rapgef2	-0.0221	0.896	0.946
Birc2	0.0179	0.91	0.95
Bcl6	0.0172	0.911	0.95
Cd55	-0.0365	0.918	0.951
Csf1	-0.031	0.932	0.959
Ly96	0.0116	0.94	0.962
Ifit3	0.0235	0.954	0.971
Gnas	0.00439	0.979	0.981
Cdc42	-0.00239	0.981	0.981
Mef2d	0.00401	0.981	0.981

## Sheet: Supplementary Table S3
Supplementary Table S3. StringDB PPI KEGG Pathway enrichement
Term	Matching proteins in your network (labels)	Gene Count	Background gene count	Enrichment strength	False discovery rate (FDR)		Criteria for significance
mmu04657:IL-17 signaling pathway	Ccl2,Mmp9,Tnfaip3,Il1b,Cxcl5,Cxcl1,Mmp3,Mapk3,Ccl20	9	91	1.92	2.35e-13
mmu04668:TNF signaling pathway	Ccl2,Mmp9,Tnfaip3,Il1b,Cxcl1,Mmp3,Ccl5,Mapk3,Ccl20	9	108	1.85	5.03e-13		FDR ≤ 0.05 and
mmu05323:Rheumatoid arthritis	Ccl2,Itgb2,Il1b,Cxcl5,Mmp3,Ccl5,H2-Eb1,Ccl20	8	81	1.92	3.58e-12		Minimum gene count =3
mmu04062:Chemokine signaling pathway	Ccl2,Cxcl5,Cxcl1,Ccl22,Ccl5,Mapk3,Cxcr4,Ccl20	8	179	1.58	1.13e-09
mmu04060:Cytokine-cytokine receptor interaction	Ccl2,Il1b,Cxcl5,Cxcl1,Ccl22,Ccl5,Cxcr4,Ccl20	8	252	1.43	1.25e-08
mmu04620:Toll-like receptor signaling pathway	Tollip,Il1b,Ccl5,Mapk3,Tlr5,Tlr8	6	98	1.72	4.84e-08
mmu04621:NOD-like receptor signaling pathway	Ccl2,Tnfaip3,Il1b,Cxcl1,Ccl5,Mapk3	6	164	1.49	7.96e-07		Legend
mmu05164:Influenza A	Ccl2,Il1b,Ccl5,Mapk3,H2-Eb1	5	165	1.41	2.12e-05
mmu05134:Legionellosis	Itgb2,Il1b,Cxcl1,Tlr5	4	57	1.77	1.36e-05		Top 5 inflammation related enriched pathways
mmu05140:Leishmaniasis	Itgb2,Il1b,Mapk3,H2-Eb1	4	65	1.72	1.99e-05
mmu05133:Pertussis	Itgb2,Il1b,Cxcl5,Mapk3	4	74	1.66	2.66e-05		Key inflammatory cytokine/chemokine related hub genes
mmu05132:Salmonella infection	Il1b,Cxcl1,Mapk3,Tlr5	4	78	1.64	2.98e-05
mmu05142:Chagas disease (American trypanosomiasis)	Ccl2,Il1b,Ccl5,Mapk3	4	101	1.53	7.38e-05
mmu05418:Fluid shear stress and atherosclerosis	Ccl2,Mmp9,Il1b,Nfe2l2	4	140	1.38	0.00022
mmu05152:Tuberculosis	Itgb2,Il1b,Mapk3,H2-Eb1	4	172	1.29	0.0004
mmu05168:Herpes simplex infection	Ccl2,Il1b,Ccl5,H2-Eb1	4	202	1.23	0.00067
mmu05200:Pathways in cancer	Mmp9,Mapk3,Cxcr4,Nfe2l2	4	522	0.81	0.0141
mmu05020:Prion diseases	Il1b,Ccl5,Mapk3	3	34	1.87	0.00011
mmu05144:Malaria	Ccl2,Itgb2,Il1b	3	45	1.75	0.00022
mmu05150:Staphylococcus aureus infection	Itgb2,H2-Eb1,Masp1	3	50	1.71	0.00028
mmu05321:Inflammatory bowel disease (IBD)	Il1b,H2-Eb1,Tlr5	3	58	1.64	0.0004
mmu05215:Prostate cancer	Mmp9,Mmp3,Mapk3	3	97	1.42	0.0015
mmu04659:Th17 cell differentiation	Il1b,Mapk3,H2-Eb1	3	100	1.41	0.0016
mmu04933:AGE-RAGE signaling pathway in diabetic complications	Ccl2,Il1b,Mapk3	3	100	1.41	0.0016
mmu04670:Leukocyte transendothelial migration	Itgb2,Mmp9,Cxcr4	3	115	1.34	0.0021
mmu05161:Hepatitis B	Mmp9,Mapk3,Map3k1	3	143	1.25	0.0038
mmu04217:Necroptosis	Alox15,Tnfaip3,Il1b	3	158	1.21	0.0048
mmu05166:HTLV-I infection	Itgb2,H2-Eb1,Map3k1	3	269	0.98	0.0165
mmu04010:MAPK signaling pathway	Il1b,Mapk3,Map3k1	3	292	0.94	0.0197

## Sheet: Supplementary Table S4
Supplementary Table S4. Top upstream regulators indentified by IPA
Upstream regulator	Molecule type	Predicted activation state	Activation z-score	p-value of overlap	Target molecules in your dataset
PPARG	ligand-dependent nuclear receptor	Activated	2.6	0.00463	Ccl2,Ccl22,Ccl5,Cxcl2,Cxcl6,IL-1β,MMP3,MMP9,NFE2L2,Retnla
NFE2L2	transcription regulator	Activated	2.123	0.0136	Ccl2,Ccl20,Ccl5,Cxcl2,Cxcl6,IL-1β,MMP9,NFE2L2,TOLLIP
STAT6	transcription regulator	Inhibited	-2.328	0.0167	ALOX15,Ccl2,Ccl20,Ccl22,Ccl5,Chil3/Chil4,Cxcl2,IL-1β,MMP9,Retnla
Legend		Criteria for significance
Activated		Fisher’s exact p-value of overlap < 0.05 and
Inhibited		z-score >2 or z-score < -2

## Sheet: Supplementary Table S5
Supplementary Table S5. Top biofunctions and diseases indentified by IPA
Categories	Diseases	p-value	Predicted activation state	z-score	Molecules	# Molecules
Cell-To-Cell Signaling and Interaction,Cellular Movement	Recruitment of myeloid cells	6.43e-05	Decreased	-3.612	ALOX15,Ccl19,Ccl2,Ccl20,Ccl22,Ccl5,Chil3/Chil4,Cxcl2,Cxcl6,Cxcr4,IL-1β,ITGB2,MMP9,NFE2L2,Retnla,TLR5	16
Cell-To-Cell Signaling and Interaction,Cellular Movement,Hematological System Development and Function,Immune Cell Trafficking	Recruitment of granulocytes	3.31e-05	Decreased	-3.345	ALOX15,Ccl19,Ccl2,Ccl20,Ccl22,Ccl5,Chil3/Chil4,Cxcl2,Cxcl6,IL-1β,ITGB2,MMP9,NFE2L2,Retnla,TLR5	15
Cellular Movement,Immune Cell Trafficking	Cell movement of lymphatic system cells	0.0337	Decreased	-3.333	Ccl19,Ccl2,Ccl20,Ccl22,Ccl5,Chil3/Chil4,Cxcl6,Cxcr4,IL-1β,ITGB2,MMP9,Retnla	12
Cellular Movement,Hematological System Development and Function,Immune Cell Trafficking,Inflammatory Response	Migration of phagocytes	0.00424	Decreased	-3.322	ALOX15,Ccl19,Ccl2,Ccl20,Ccl22,Ccl5,Cxcl2,Cxcl6,Cxcr4,IL-1β,ITGB2,MMP9	12
Cell-To-Cell Signaling and Interaction,Cellular Movement,Hematological System Development and Function,Immune Cell Trafficking	Recruitment of leukocytes	0.00114	Decreased	-3.299	ALOX15,Ccl19,Ccl2,Ccl20,Ccl22,Ccl5,Chil3/Chil4,Cxcl2,Cxcl6,Cxcr4,IL-1β,ITGB2,MMP9,NFE2L2,Retnla,TLR5	16
Cellular Movement,Hematological System Development and Function,Immune Cell Trafficking,Inflammatory Response	Cell movement of phagocytes	0.0352	Decreased	-3.24	ALOX15,Ccl19,Ccl2,Ccl20,Ccl22,Ccl5,Cxcl2,Cxcl6,Cxcr4,IL-1β,ITGB2,MAPK3,Masp1,MMP9,NFE2L2,TNFAIP3	16
Cellular Movement,Immune Cell Trafficking	Migration of lymphatic system cells	0.0324	Decreased	-3.174	Ccl19,Ccl2,Ccl20,Ccl22,Ccl5,Chil3/Chil4,Cxcr4,IL-1β,ITGB2,MMP9,Retnla	11
Cellular Movement	Cell movement of myeloid cells	0.0206	Decreased	-3.124	ALOX15,Ccl19,Ccl2,Ccl20,Ccl22,Ccl5,Chil3/Chil4,Cxcl2,Cxcl6,Cxcr4,IL-1β,ITGB2,MAPK3,Masp1,MMP9,NFE2L2,TNFAIP3	17
Inflammatory Response	Inflammatory response	0.0021	Decreased	-3.069	ALOX15,Ccl19,Ccl2,Ccl20,Ccl22,Ccl5,CD163,Chil3/Chil4,Cxcl2,Cxcl6,Cxcr4,IL-1β,ITGB2,MAPK3,MMP9,NFE2L2,Retnla,TLR5,TLR8,TNFAIP3,TOLLIP	21
Cellular Movement	Transmigration of cells	0.00756	Decreased	-2.914	Ccl19,Ccl2,Ccl22,Ccl5,Cxcl2,Cxcr4,IL-1β,ITGB2,MMP9	9
Cellular Movement	Migration of myeloid cells	0.0168	Decreased	-2.9	Ccl19,Ccl2,Ccl5,Cxcl2,Cxcl6,Cxcr4,IL-1β,ITGB2,MMP9	9
Cellular Movement,Hematological System Development and Function,Immune Cell Trafficking	Cell movement of antigen presenting cells	0.0205	Decreased	-2.889	ALOX15,Ccl19,Ccl2,Ccl20,Ccl22,Ccl5,Cxcr4,IL-1β,ITGB2,MAPK3,Masp1,MMP9,NFE2L2,TNFAIP3	14
Cell-To-Cell Signaling and Interaction,Cellular Movement,Hematological System Development and Function,Immune Cell Trafficking,Inflammatory Response	Recruitment of neutrophils	0.000134	Decreased	-2.877	ALOX15,Ccl19,Ccl2,Ccl20,Ccl22,Ccl5,Cxcl2,Cxcl6,IL-1β,ITGB2,MMP9,NFE2L2,TLR5	13
Cell-mediated Immune Response,Cellular Movement,Hematological System Development and Function,Immune Cell Trafficking	Cell movement of T lymphocytes	0.016	Decreased	-2.857	Ccl19,Ccl2,Ccl20,Ccl22,Ccl5,Chil3/Chil4,Cxcr4,IL-1β,ITGB2,MMP9	10
Cellular Movement	Chemotaxis of myeloid cells	0.00327	Decreased	-2.768	Ccl19,Ccl2,Ccl20,Ccl22,Ccl5,Chil3/Chil4,Cxcl2,Cxcl6,Cxcr4,IL-1β,ITGB2,MAPK3	12
Cellular Movement,Hematological System Development and Function,Immune Cell Trafficking,Inflammatory Response	Chemotaxis of mononuclear leukocytes	0.00169	Decreased	-2.757	Ccl19,Ccl2,Ccl20,Ccl22,Ccl5,Chil3/Chil4,Cxcl6,Cxcr4,IL-1β,MMP9	10
Cellular Movement,Hematological System Development and Function,Immune Cell Trafficking,Inflammatory Response,Lymphoid Tissue Structure and Development	Chemotaxis of lymphocytes	0.00201	Decreased	-2.75	Ccl19,Ccl2,Ccl20,Ccl22,Ccl5,Chil3/Chil4,Cxcl6,Cxcr4,MMP9	9
Cellular Movement,Hematological System Development and Function,Immune Cell Trafficking,Inflammatory Response	Chemotaxis of leukocytes	0.00614	Decreased	-2.749	Ccl19,Ccl2,Ccl20,Ccl22,Ccl5,Chil3/Chil4,Cxcl2,Cxcl6,Cxcr4,IL-1β,ITGB2,MAPK3,MMP9	13
Cellular Movement,Hematological System Development and Function,Immune Cell Trafficking	Migration of antigen presenting cells	0.00756	Decreased	-2.722	ALOX15,Ccl19,Ccl2,Ccl20,Ccl22,Ccl5,Cxcr4,IL-1β,MMP9	9
Cellular Movement,Hematological System Development and Function,Immune Cell Trafficking,Inflammatory Response	Migration of neutrophils	0.00939	Decreased	-2.699	Ccl19,Ccl2,Ccl5,Cxcl2,Cxcl6,IL-1β,ITGB2,MMP9	8
Cellular Movement	Chemotaxis	0.0452	Decreased	-2.611	Ccl19,Ccl2,Ccl20,Ccl22,Ccl5,Chil3/Chil4,Cxcl2,Cxcl6,Cxcr4,IL-1β,ITGB2,MAP3K1,MAPK3,MMP9	14
Cell-mediated Immune Response,Cellular Movement,Hematological System Development and Function,Immune Cell Trafficking,Inflammatory Response,Lymphoid Tissue Structure and Development	Chemotaxis of T lymphocytes	0.00789	Decreased	-2.597	Ccl19,Ccl2,Ccl20,Ccl22,Ccl5,Chil3/Chil4,Cxcr4	7
Cellular Movement	Extravasation	0.0272	Decreased	-2.596	Ccl2,Ccl5,Chil3/Chil4,Cxcr4,IL-1β,ITGB2,MMP3	7
Cell-To-Cell Signaling and Interaction,Cellular Movement,Hematological System Development and Function,Immune Cell Trafficking	Recruitment of antigen presenting cells	0.00169	Decreased	-2.595	Ccl19,Ccl2,Ccl20,Ccl22,Ccl5,IL-1β,ITGB2,MMP9,NFE2L2,TLR5	10
Cell-To-Cell Signaling and Interaction,Cellular Movement,Immune Cell Trafficking	Attraction of phagocytes	0.000732	Decreased	-2.592	Ccl19,Ccl2,Ccl20,Ccl22,Ccl5,Cxcl6,IL-1β	7
Cellular Movement,Immune Cell Trafficking	Emigration of leukocytes	0.000174	Decreased	-2.591	Ccl19,Ccl2,Cxcl2,Cxcl6,Cxcr4,IL-1β,ITGB2	7
Cell-To-Cell Signaling and Interaction,Hematological System Development and Function	Binding of T lymphocytes	0.0154	Decreased	-2.582	Ccl19,Ccl20,Ccl22,Ccl5,Cxcr4,IL-1β,ITGB2	7
Cellular Movement,Hematological System Development and Function,Immune Cell Trafficking	Transmigration of leukocytes	0.0126	Decreased	-2.568	Ccl19,Ccl2,Ccl5,Cxcl2,Cxcr4,IL-1β,ITGB2,MMP9	8
Cellular Movement,Hematological System Development and Function,Immune Cell Trafficking,Inflammatory Response	Cell movement of monocytes	0.000888	Decreased	-2.562	Ccl19,Ccl2,Ccl20,Ccl22,Ccl5,Cxcr4,IL-1β,ITGB2,MMP9	9
Cellular Movement,Hematological System Development and Function,Immune Cell Trafficking,Inflammatory Response	Chemotaxis of phagocytes	0.00745	Decreased	-2.553	Ccl19,Ccl2,Ccl20,Ccl22,Ccl5,Cxcl2,Cxcl6,Cxcr4,IL-1β,ITGB2,MAPK3	11
Cellular Movement,Hematological System Development and Function,Immune Cell Trafficking,Inflammatory Response	Cell movement of dendritic cells	0.00407	Decreased	-2.505	Ccl19,Ccl2,Ccl20,Ccl22,Ccl5,Cxcr4,IL-1β,MAPK3,MMP9	9
Cell-To-Cell Signaling and Interaction,Hematological System Development and Function,Immune Cell Trafficking,Inflammatory Response	Activation of phagocytes	0.00544	Decreased	-2.43	Ccl2,Ccl20,Ccl22,Ccl5,CD163,Chil3/Chil4,Cxcl6,IL-1β,ITGB2,MAPK3,MMP9,Retnla,TLR5,TLR8,TOLLIP	15
Cellular Movement,Hematological System Development and Function,Immune Cell Trafficking,Inflammatory Response	Migration of monocytes	0.00131	Decreased	-2.425	Ccl19,Ccl2,Ccl20,Ccl22,Ccl5,ITGB2,MMP9	7
Cellular Movement,Hematological System Development and Function,Immune Cell Trafficking	Mobilization of leukocytes	0.00845	Decreased	-2.408	Ccl2,Ccl20,Cxcl2,Cxcr4,IL-1β,ITGB2	6
Cell-To-Cell Signaling and Interaction,Cellular Movement	Chemoattraction	0.0335	Decreased	-2.402	Ccl19,Ccl2,Ccl20,Ccl22,Ccl5,IL-1β	6
Cell-To-Cell Signaling and Interaction,Cellular Movement,Hematological System Development and Function,Immune Cell Trafficking,Inflammatory Response	Recruitment of macrophages	0.0207	Decreased	-2.401	Ccl2,Ccl22,Ccl5,IL-1β,ITGB2,MMP9,NFE2L2	7
Cellular Movement	Extravasation of cells	0.025	Decreased	-2.401	Ccl2,Ccl5,Chil3/Chil4,Cxcr4,IL-1β,ITGB2	6
Hematological System Development and Function,Immune Cell Trafficking,Inflammatory Response,Tissue Development	Accumulation of granulocytes	0.0207	Decreased	-2.395	Ccl2,Ccl5,Cxcl2,IL-1β,ITGB2,MAPK3,MMP9	7
Cell-mediated Immune Response,Cell-To-Cell Signaling and Interaction,Cellular Movement,Hematological System Development and Function,Immune Cell Trafficking	Adhesion of T lymphocytes	0.025	Decreased	-2.391	Ccl19,Ccl20,Ccl22,Cxcr4,IL-1β,ITGB2	6
Cancer,Cellular Movement,Organismal Injury and Abnormalities,Tumor Morphology	Invasion of tumor cells	0.0335	Decreased	-2.39	Cxcl2,Cxcl6,Cxcr4,MMP3,MMP9,NFE2L2	6
Cellular Movement,Hematological System Development and Function,Immune Cell Trafficking,Inflammatory Response	Migration of dendritic cells	0.00353	Decreased	-2.303	Ccl19,Ccl20,Ccl22,Ccl5,Cxcr4,IL-1β,MMP9	7
Cellular Movement,Hematological System Development and Function,Immune Cell Trafficking	Trafficking of leukocytes	3.04e-05	Decreased	-2.213	Ccl19,Ccl2,Ccl20,Ccl22,Ccl5,Cxcl6,Cxcr4,ITGB2	8
Cellular Movement,Hematological System Development and Function,Immune Cell Trafficking,Inflammatory Response	Mobilization of phagocytes	0.00438	Decreased	-2.211	Ccl2,Ccl20,Cxcl2,Cxcr4,IL-1β	5
Cellular Movement,Hematological System Development and Function,Immune Cell Trafficking	Influx of leukocytes	0.00845	Decreased	-2.2	Ccl2,Cxcl2,Cxcl6,IL-1β,ITGB2,MMP9	6
Cell Morphology	Polarization of lymphocytes	0.0399	Decreased	-2.194	Ccl19,Ccl22,Cxcr4,IL-1β,ITGB2	5
Cell-To-Cell Signaling and Interaction,Cellular Movement,Immune Cell Trafficking	Attraction of antigen presenting cells	0.00438	Decreased	-2.19	Ccl19,Ccl20,Ccl22,Ccl5,IL-1β	5
Cell-To-Cell Signaling and Interaction,Cellular Movement,Hematological System Development and Function,Immune Cell Trafficking,Inflammatory Response	Chemoattraction of phagocytes	0.00438	Decreased	-2.189	Ccl19,Ccl2,Ccl20,Ccl22,Ccl5	5
Cell-To-Cell Signaling and Interaction,Cellular Movement,Immune Cell Trafficking	Attraction of mononuclear leukocytes	0.00784	Decreased	-2.164	Ccl19,Ccl2,Ccl22,Ccl5,IL-1β	5
Cellular Movement,Hematological System Development and Function,Immune Cell Trafficking,Inflammatory Response	Chemotaxis of monocytes	0.00181	Decreased	-2.152	Ccl2,Ccl20,Ccl22,Ccl5,Cxcr4,IL-1β	6
Cancer,Cellular Movement,Organismal Injury and Abnormalities,Tumor Morphology	Invasion of cancer cells	0.0197	Decreased	-2.111	Cxcl2,Cxcl6,Cxcr4,MMP9,NFE2L2	5
Cellular Movement,Hematological System Development and Function,Immune Cell Trafficking,Inflammatory Response	Cell movement of macrophages	0.0141	Decreased	-2.095	ALOX15,Ccl19,Ccl2,Ccl22,Ccl5,Cxcr4,IL-1β,ITGB2,MAPK3,Masp1,MMP9,NFE2L2,TNFAIP3	13
Cell-To-Cell Signaling and Interaction,Hematological System Development and Function	Activation of myeloid cells	0.0205	Decreased	-2.078	Ccl2,Ccl22,Ccl5,CD163,Chil3/Chil4,Cxcl6,IL-1β,ITGB2,MAPK3,MMP9,Retnla,TLR8,TOLLIP	13
Cellular Movement,Hematological System Development and Function,Immune Cell Trafficking,Inflammatory Response	Chemotaxis of dendritic cells	0.00221	Decreased	-2.044	Ccl19,Ccl2,Ccl20,Ccl22,Ccl5,Cxcr4,IL-1β	7
Cell-To-Cell Signaling and Interaction,Cellular Movement,Hematological System Development and Function,Immune Cell Trafficking,Inflammatory Response	Recruitment of dendritic cells	7.06e-05	Decreased	-2	Ccl19,Ccl2,Ccl20,Ccl22,Ccl5,MMP9,TLR5	7
Criteria for significance			Legend
Fisher’s exact p-value of overlap < 0.05 and			Decreased
z-score >2 or z-score < -2
